# Supplementary material for: CENP‐C unwraps the human CENP‐A nucleosome through the H2A C‐terminal tail
Source: PubMed Central journal article supplement — EMBO Rep. 2019 Sep 2;20(10):e48913. doi: 10.15252/embr.201948913 (PMC6776904; doi:10.15252/embr.201948913), 2019-09-02
Supplement: EMBR-20-e48913-s002.pdf [file EMBR-20-e48913-s002.pdf]

## Expanded View Figures

**Figure EV1. CENP-A nucleosome structural features.**

- A Virtual gels from Bioanalyzer showing DNA digestion for CENP-A and H3 nucleosomes on three different DNA templates.
- B (Top) Sequence overlay of the N-terminus of H3 and CENP-A, indicating swapped sequences used in CENP-A<sup>H3(N-tail)</sup> and H3<sup>CENP-A(N-tail)</sup> constructs. (Bottom) Virtual gels of MNase digestion for CENP-A<sup>H3(N-tail)</sup> and H3<sup>CENP-A(N-tail)</sup> nucleosomes assembled on 601 DNA.
- C Representative cryo-EM map of the CENP-A nucleosome, illustrating quality of map and model fitting.
- D EM density of CENP-A-specific features on the nucleosome:  $\alpha$ N helix (2 different sides), C-terminal tail and RG-loop.

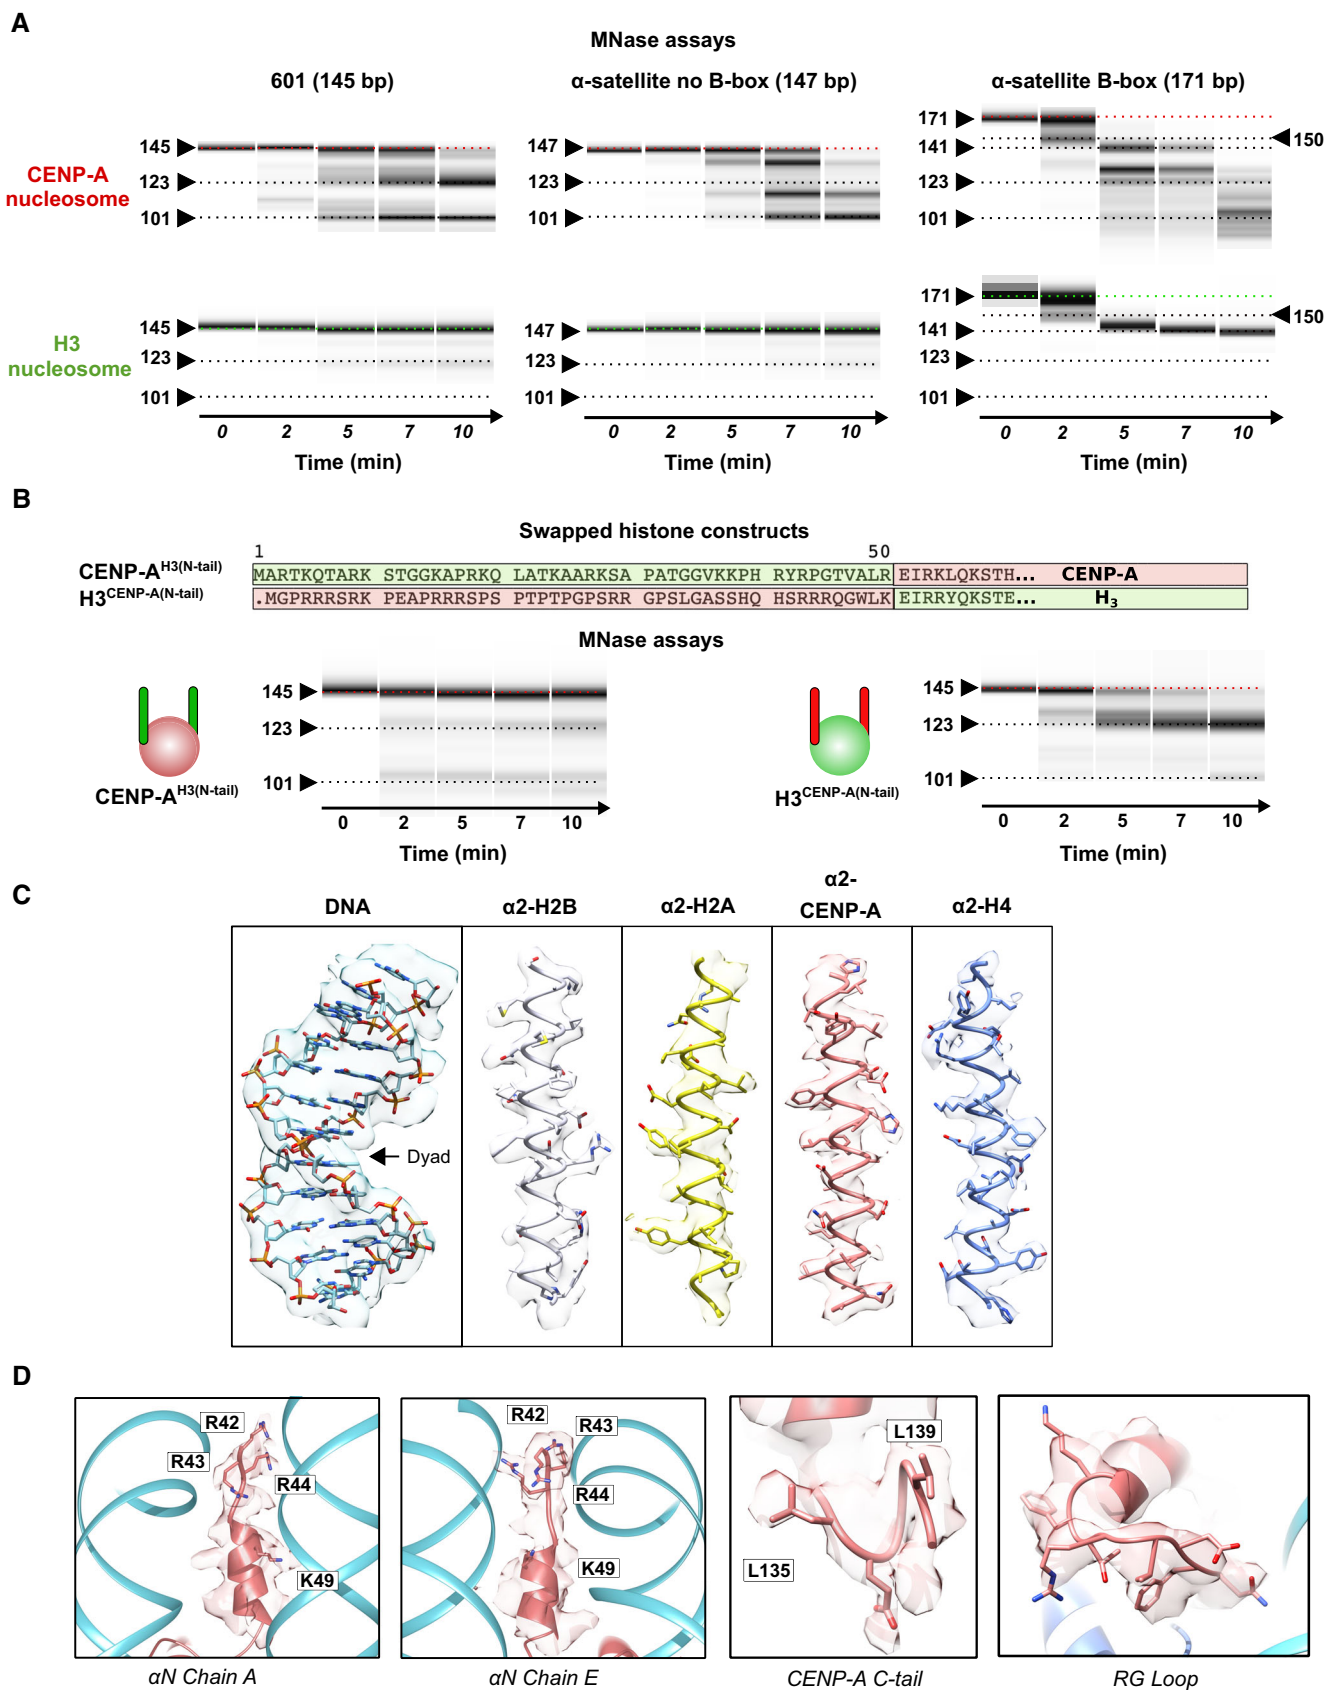

Figure EV1.

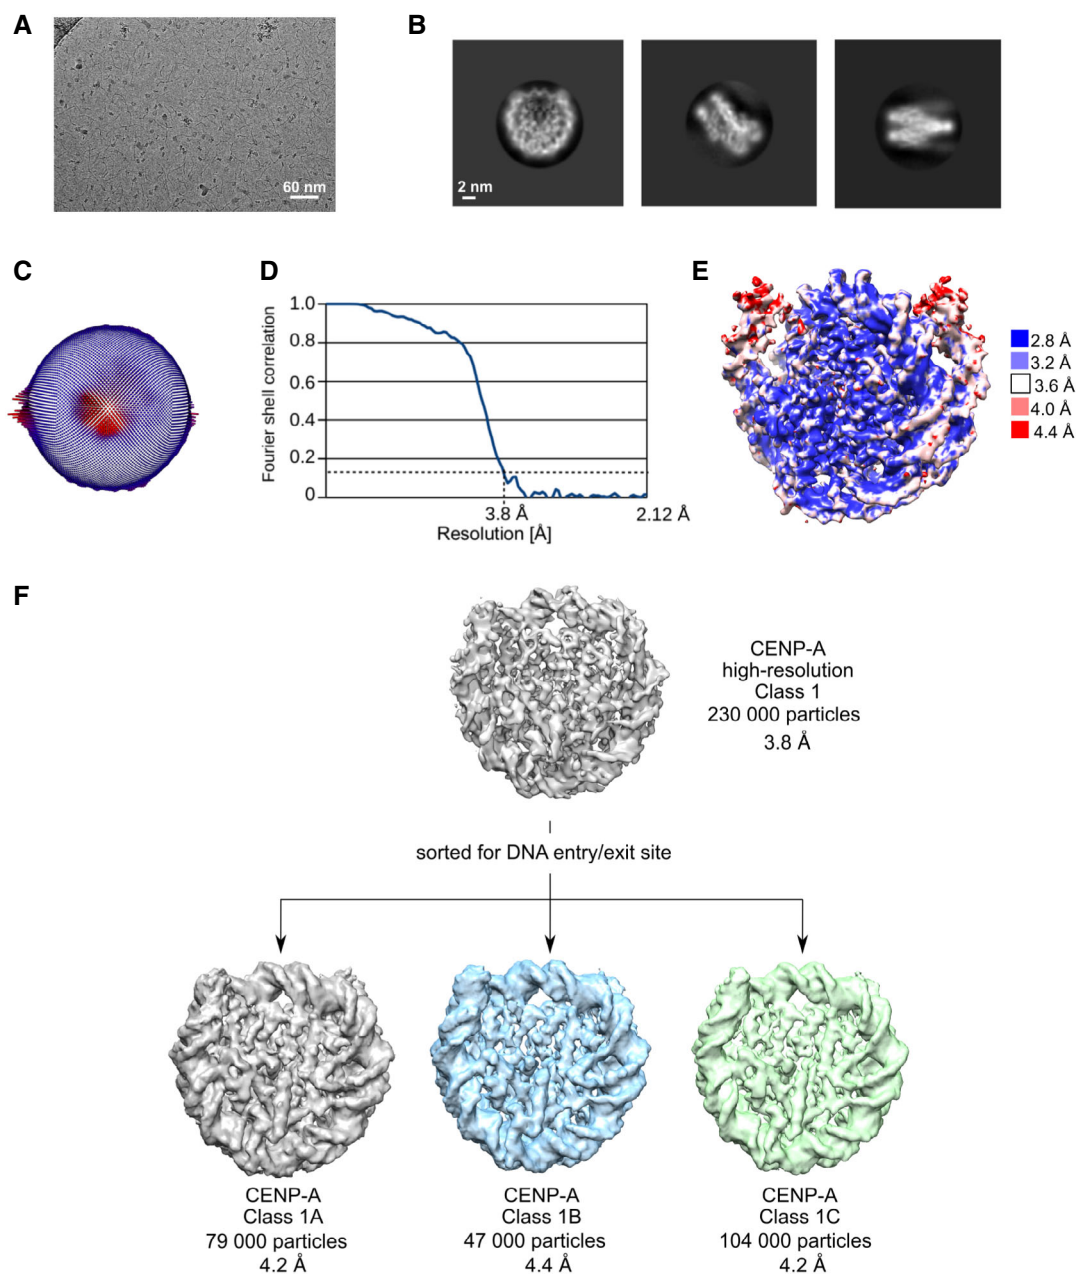

**Figure EV2. Cryo-EM analysis of CENP-A nucleosome.**

- A Representative cryo-EM raw micrograph.
- B Subset of selected 2D class averages.
- C Euler angle distribution of particles used in the final 3D reconstruction.
- D Fourier shell correlation (FSC) curves of the final density map (CENP-A high resolution).
- E Local resolution of the final 3D density map.
- F Particles used for the high-resolution CENP-A map were further classified for DNA entry/exit site in order to highlight differences at this part of the nucleosome. Gray map (Class 1A) has loosest DNA wrap, and green map (Class 1C) has tightest DNA wrap. The blue map represents particles that were in-between two extreme conformations.

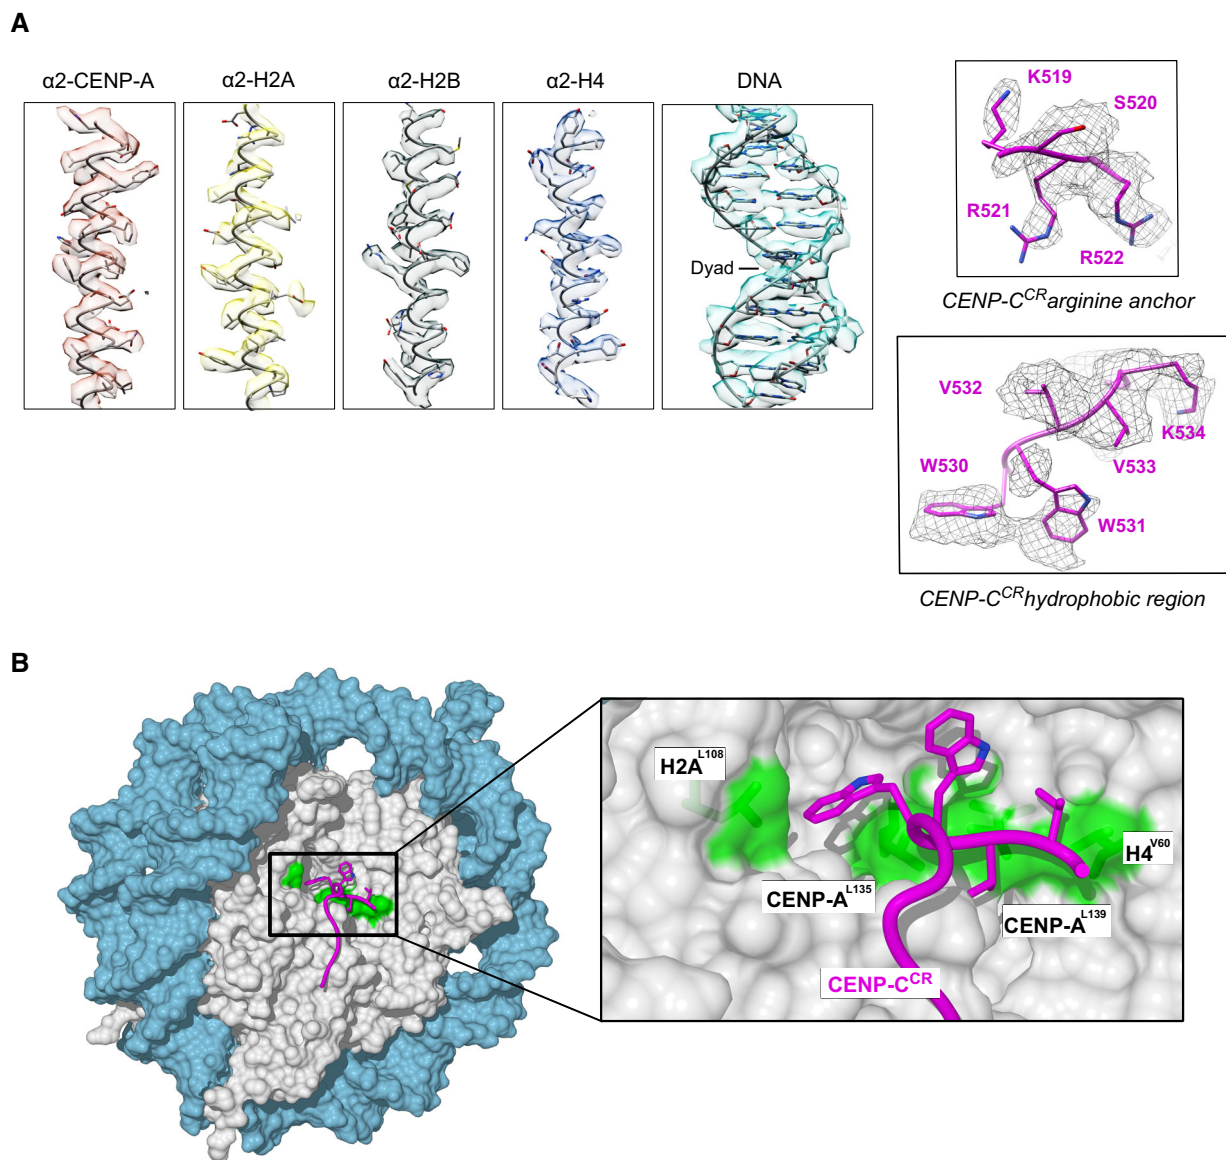

**Figure EV3. CENP-A nucleosome/CENP-C<sup>CR</sup> complex structure.**

A Representative cryo-EM densities showing fitted model for DNA and each of the histones (left), arginine anchor, and hydrophobic regions of CENP-C<sup>CR</sup> (right).  
 B Surface representation of nucleosome (histone core—gray, DNA—blue), showing a hydrophobic groove (green) on the nucleosome formed by H2A<sup>L108</sup>, CENP-A<sup>L135</sup>, and H4<sup>V60</sup>. CENP-C<sup>CR</sup> is shown as a purple coil with hydrophobic sidechains in stick representation.

**Figure EV4. Cryo-EM analysis of CENP-A/CENP-C<sup>CR</sup> complex.**

A Representative cryo-EM raw micrograph.  
 B Subset of selected 2D class averages.  
 C Euler angle distribution of particles used in the final 3D reconstruction for CENP-A/CENP-C<sup>CR</sup> high resolution and CENP-A/CENP-C<sup>CR</sup> complex enriched for CENP-C<sup>CR</sup>.  
 D Fourier shell correlation (FSC) curves of the final density map for CENP-A/CENP-C<sup>CR</sup> high resolution and CENP-A/CENP-C<sup>CR</sup> enriched for CENP-C<sup>CR</sup>.  
 E Local resolution of the final 3D density maps.  
 F First, particles were sorted for high resolution, and this map was used for initial model building. A map enriched in CENP-C<sup>CR</sup> was generated to increase map quality around CENP-C<sup>CR</sup>. Particles used for the later map were further classified for DNA entry/exit site in order to highlight extend of DNA unwrapping. The gray map (Class 2A) has the loosest DNA wrap, and the green map (Class 2C) has tightest DNA wrap. The blue map presents particles that were in-between two extreme conformations.

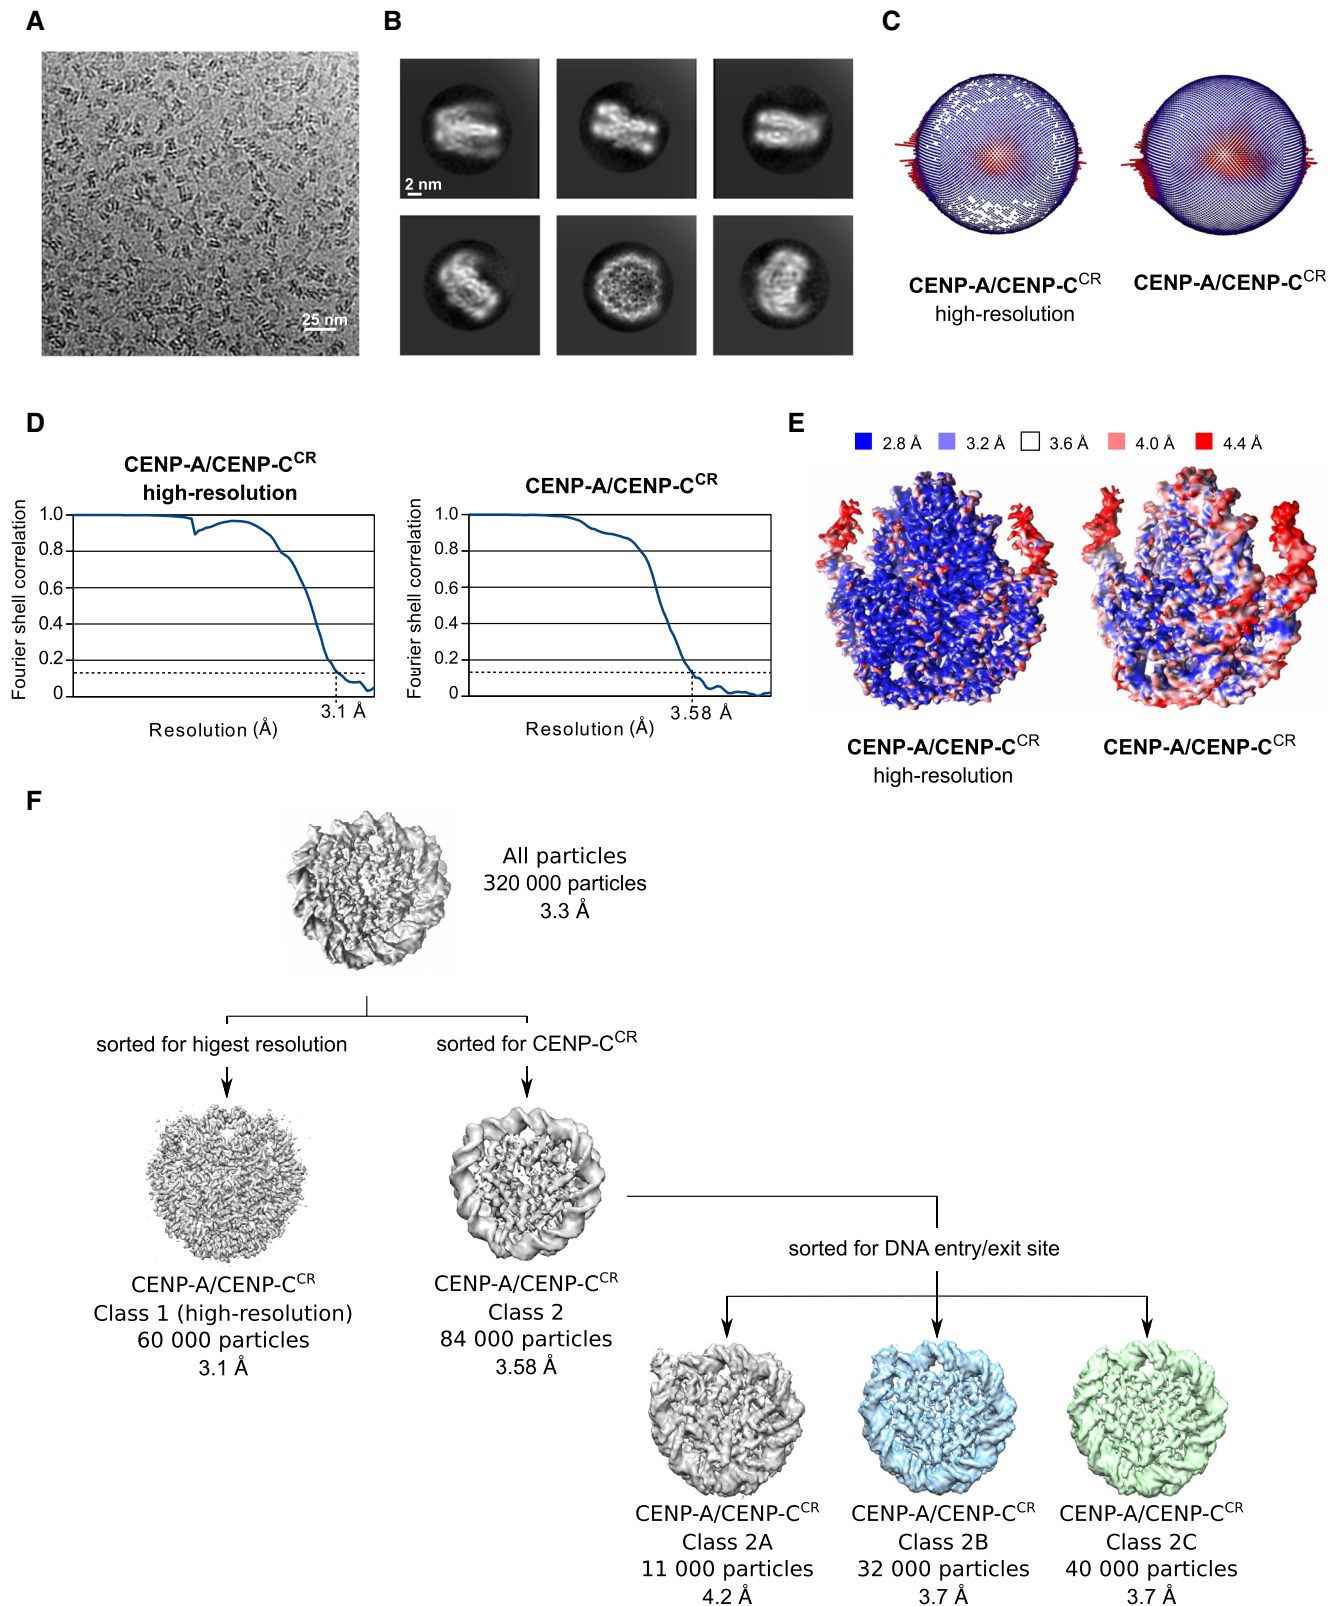

Figure EV4.

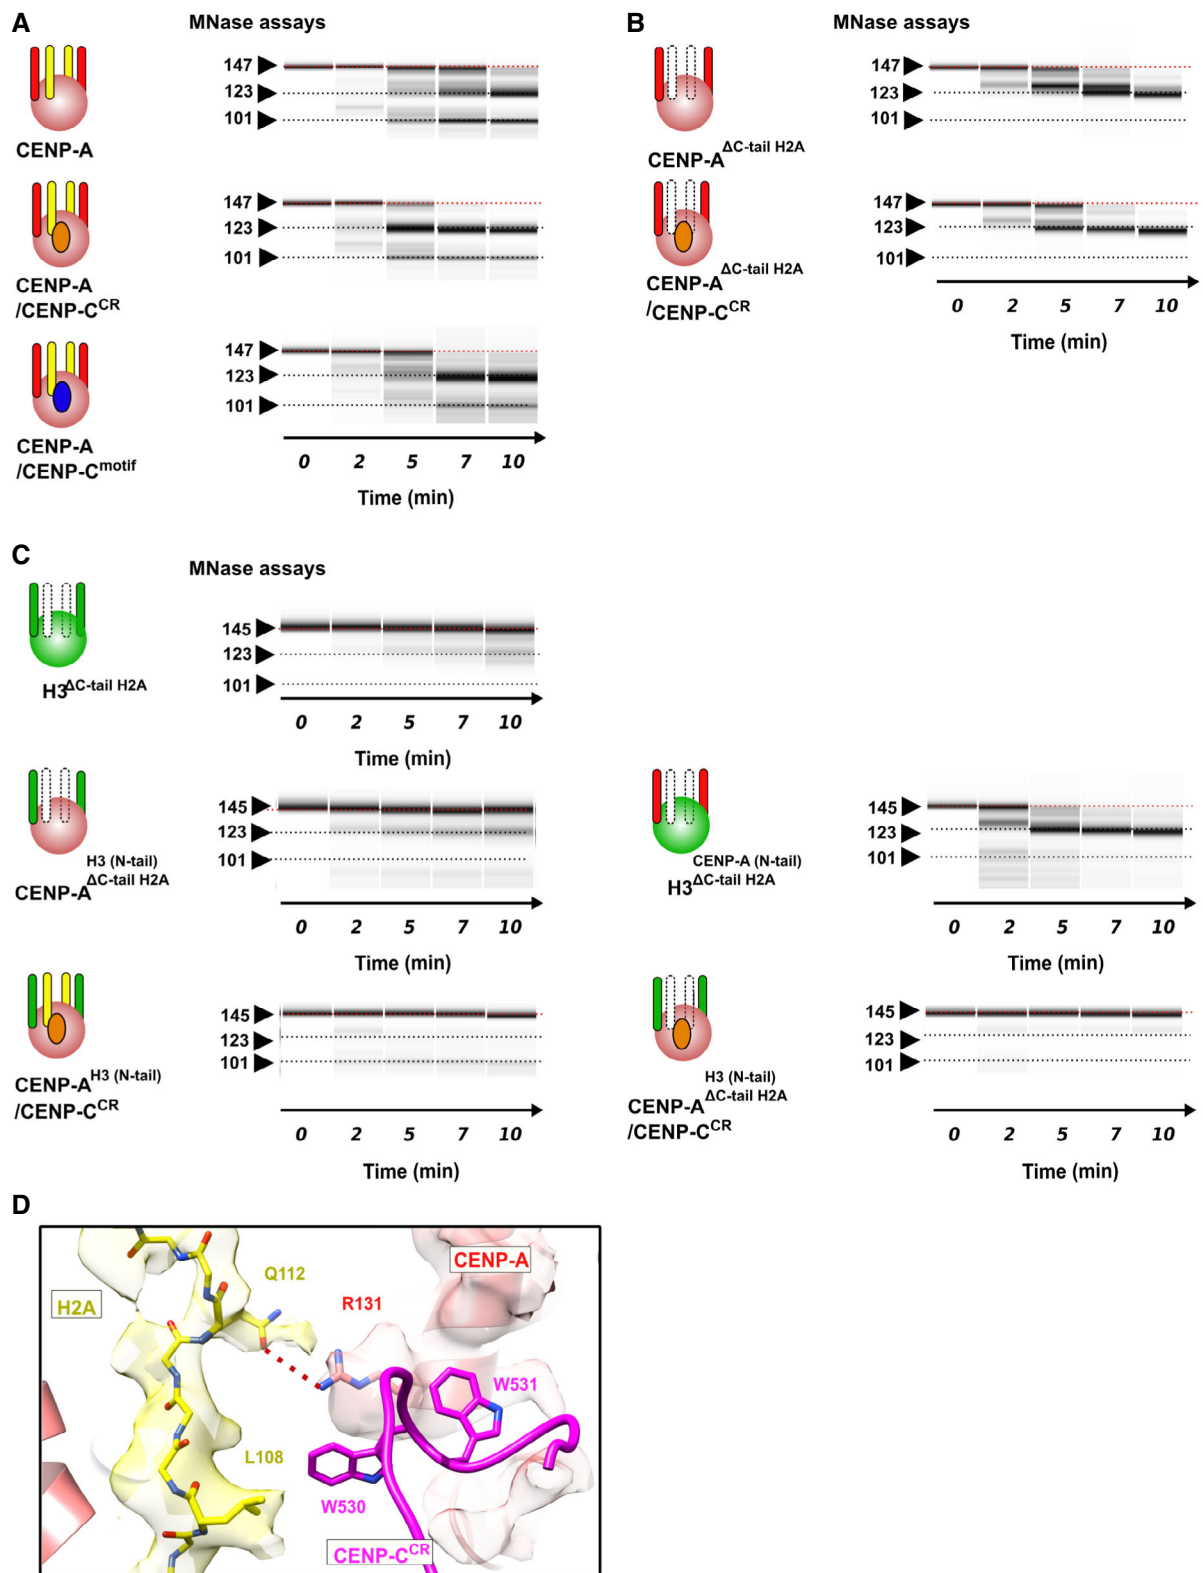

Figure EV5.

**Figure EV5. Conformational changes on the CENP-A nucleosome upon CENP-C<sup>CR</sup> binding.**

A–C Virtual gels for MNase digestion. CENP-A nucleosomes are pink, and H3 nucleosomes are green balls. CENP-A N-terminal tail (aa 1–49) is red stick, H3 N-terminal tail (aa 1–50) is green stick, H2A C-terminal tail (aa 110–130) is yellow stick, CENP-C<sup>CR</sup> is orange circle, and CENP-C<sup>motif</sup> is blue circle. Deleted H2A C-terminal tail is indicated as dotted white stick. (A) MNase digestion of the CENP-A nucleosome alone and in complex with CENP-C<sup>CR</sup> or CENP-C<sup>motif</sup> (also in Fig 4A). (B) MNase digestion of the CENP-A nucleosome assembled with H2A lacking 110–130 residues, alone (top) or in complex with CENP-C<sup>CR</sup> (bottom), showing similar magnitude of digestion. (C) (Top) MNase digestion of the H3<sup>ΔC-tail</sup> H2A, indicating that removal of H2A<sup>110–130</sup> does not have an effect on the DNA digestion speed in the context of H3 nucleosome. (Middle) MNase digestion of CENP-A<sup>H3(N-tail)</sup>, ΔC-tail H2A and H3<sup>CENP-A(N-tail)</sup>, ΔC-tail H2A, indicating that removal of H2A<sup>110–130</sup> does not have an effect on the DNA digestion speed in the context of CENP-A<sup>H3(N-tail)</sup> nucleosome, but digestion is slightly increased in the context of H3<sup>CENP-A(N-tail)</sup>. (Bottom) MNase digestion of the CENP-A<sup>H3(N-tail)</sup> is unaffected with CENP-C<sup>CR</sup> binding independently of the presence of H2A<sup>110–130</sup>.

D Interactions between H2A C-terminal tail and CENP-C<sup>CR</sup>.
